# Supplementary material for: Multi-Omics Analysis Revealed a Significant Alteration of Critical Metabolic Pathways Due to Sorafenib-Resistance in Hep3B Cell Lines
Source: MDPI journal article supplement (doi:10.3390/ijms231911975), 2022-10-09
Supplement: s1 [file s1]

**Summary Table S1.** Summary of the significant **decreased proteins levels** in resistant Hep3B cells vs. Parental Hep3B cells.

| <b>Protein<br/>UniProt ID</b> | <b>Protein<br/>description</b>            | <b>Abundan<br/>ce levels</b> | <b>GO – Biological process *<br/>(source Uniprot)</b>                                                                                                                                          | <b>Possible Association with Liver<br/>cancer or any other cancer</b>                                                                                                                                                                                                   |
|-------------------------------|-------------------------------------------|------------------------------|------------------------------------------------------------------------------------------------------------------------------------------------------------------------------------------------|-------------------------------------------------------------------------------------------------------------------------------------------------------------------------------------------------------------------------------------------------------------------------|
| Q9C0H2                        | Protein tweety<br>homolog 3               | Decrease                     | chloride transport,<br>ion transmembrane transport                                                                                                                                             | TTYH3 overexpression supports cell<br>migration, proliferation, and invasion<br>in cholangiocarcinoma (CCA),<br>Overexpression of TTYH3 in ovarian<br>cancer suggested worse prognosis<br>and clinical outcomes,                                                        |
| P07148                        | Fatty acid-<br>binding protein,<br>liver  | Decrease                     | cellular response to hydrogen<br>peroxide,<br>negative regulation of<br>apoptotic process,<br>negative regulation of cysteine-<br>type endopeptidase activity<br>involved in apoptotic process | L-FABP has a significant function in<br>oxidative stress, L-FABP occurs at the<br>adenoma stage of colorectal tumour<br>development and indicates that L-<br>FABP is a marker of colorectal cancer<br>differentiation                                                   |
| Q12769                        | Nuclear pore<br>complex protein<br>Nup160 | Decrease                     | mRNA export from nucleus,<br>nucleocytoplasmic transport,<br>protein transport                                                                                                                 | Inhibition of nuclear pore complex<br>stimulates cancer cell death                                                                                                                                                                                                      |
| O95573                        | Fatty acid CoA<br>ligase Acsl3            | Decrease                     | fatty acid metabolic process,<br>very-low-density lipoprotein<br>particle assembly,<br>positive regulation of<br>phosphatidylcholine<br>biosynthetic process                                   | IL-6 stimulates miR-603 expression<br>that inhibits FABP1 expression,<br>encourages the protein synthesis,<br>lipid metabolism, elevated cellular<br>oxidative stress, that causes<br>metastasis of HCC, Suppression of<br>Acsl3 triggers death in NSCLC cell<br>lines. |

\* Source: UniProt, available at <https://www.uniprot.org/>

**Cont. Summary Table S2.**

| <b>Protein<br/>UniProt ID</b> | <b>Protein<br/>description</b>                            | <b>Abundan<br/>ce levels</b> | <b>GO – Biological process *</b>                                                                                                                                                  | <b>Possible Association with Liver<br/>cancer or any other cancer</b>                                                                                                           |
|-------------------------------|-----------------------------------------------------------|------------------------------|-----------------------------------------------------------------------------------------------------------------------------------------------------------------------------------|---------------------------------------------------------------------------------------------------------------------------------------------------------------------------------|
| P49591                        | Serine--tRNA<br>ligase,<br>cytoplasmic                    | Decrease                     | negative regulation of<br>angiogenesis, negative<br>regulation of transcription by<br>RNA polymerase II,                                                                          | Serine biosynthesis pathway is<br>crucial in BRAF inhibitor resistance<br>of some cancer cells.                                                                                 |
| Q9BWD1                        | Acetyl-CoA<br>acetyltransferase,<br>cytosolic             | Decrease                     | fatty acid beta-oxidation,<br>lipid metabolic process                                                                                                                             | ACAT2 stimulates cell proliferation in<br>colorectal cancer, HADHA and<br>ACAT2 down-expression were<br>associated with poorer prognosis in<br>clear cell renal cell carcinoma. |
| P13473                        | Lysosome-<br>associated<br>membrane<br>glycoprotein 2     | Decrease                     | cellular response to starvation,<br>autophagosome maturation,<br>chaperone-mediated<br>autophagy, protein targeting to<br>lysosome involved in<br>chaperone-mediated<br>autophagy | LAMP2 overexpression indicates<br>poor prognosis esophageal squamous<br>cell carcinoma patients                                                                                 |
| P04632                        | Calpain small<br>subunit 1                                | Decrease                     | positive regulation of cell<br>population proliferation,<br>regulation of macroautophagy                                                                                          | Cisplatin resistance in human gastric<br>cancer cells can be regulated by MiR-<br>99a and MiR-491 through targeting<br>CAPNS1                                                   |
| Q01581                        | Hydroxymethylgl<br>utaryl-CoA<br>synthase,<br>cytoplasmic | Decrease                     | acetyl-CoA metabolic process,<br>farnesyl diphosphate<br>biosynthetic process,<br>mevalonate pathway, lipid<br>metabolic process                                                  | -                                                                                                                                                                               |

\* Source: UniProt, available at <https://www.uniprot.org/>

**Cont. Summary Table S3.**

| <b>Protein<br/>UniProt ID</b> | <b>Protein<br/>description</b>                | <b>Abundance<br/>levels</b> | <b>GO – Biological<br/>process *</b>                                                                                         | <b>Possible Association with Liver cancer or<br/>any other cancer</b>                                                                               |
|-------------------------------|-----------------------------------------------|-----------------------------|------------------------------------------------------------------------------------------------------------------------------|-----------------------------------------------------------------------------------------------------------------------------------------------------|
| Q53GQ0                        | Very-long-chain<br>3-oxoacyl-CoA<br>reductase | Decrease                    | extracellular matrix<br>organisation, positive<br>regulation of cell-substrate<br>adhesion, estrogen<br>biosynthetic process | -                                                                                                                                                   |
| P49327                        | Fatty acid<br>synthase                        | Decrease                    | cellular response to interleukin<br>4, inflammatory response,<br>neutrophil differentiation,<br>monocyte differentiation     | Fatty acid synthase inhibition leads to<br>osteosarcoma cell invasion and<br>migration suppression by PI3K/Akt<br>signalling pathway downregulation |
| P27487                        | Dipeptidyl<br>peptidase 4                     | Decrease                    | cell adhesion, endothelial cell<br>migration, positive regulation<br>of cell population proliferation                        | Dipeptidyl peptidase 4 inhibitors<br>activate lymphocyte chemotaxis in<br>mice reduce and causes<br>hepatocellular carcinoma<br>suppression.        |
| P17174                        | Aspartate<br>aminotransferase,<br>cytoplasmic | Decrease                    | Notch signalling pathway,<br>response to glucocorticoid,<br>glutamate catabolic process to<br>aspartate                      | Resistance to the oxamate cytostatic<br>effects in breast cancer resulted from<br>over. expression of Aspartate<br>aminotransferase (AAT).          |

\* Source: UniProt, available at <https://www.uniprot.org/>

**Summary Table S2.** Summary of the significant **increased proteins levels** in resistant Hep3B cells vs. Parental phenotype

| <b>Protein<br/>UniProt ID</b> | <b>Protein<br/>description</b>                                 | <b>Abundance<br/>levels</b> | <b>GO – Biological process *</b>                                                                                                                                                                                                                                                                                                                                      | <b>Possible Association with Liver<br/>cancer or any other cancer</b>                                                                                                                                                                                         |
|-------------------------------|----------------------------------------------------------------|-----------------------------|-----------------------------------------------------------------------------------------------------------------------------------------------------------------------------------------------------------------------------------------------------------------------------------------------------------------------------------------------------------------------|---------------------------------------------------------------------------------------------------------------------------------------------------------------------------------------------------------------------------------------------------------------|
| P04179                        | Superoxide<br>dismutase [Mn],<br>mitochondrial                 | Increase                    | hydrogen peroxide biosynthetic<br>process, intrinsic apoptotic<br>signalling pathway in response<br>to DNA damage, intrinsic<br>apoptotic signalling pathway in<br>response to oxidative stress,<br>negative regulation of cell<br>population proliferation, positive<br>regulation of cell migration,<br>positive regulation of nitric oxide<br>biosynthetic process | Mn-SOD overexpressed in<br>ovarian cancer in response to<br>oxidative stress in cancer cells.<br>Endometriosis- associated<br>ovarian cancer (EAOC)<br>demonstrated high SOD2<br>expression which might be<br>prognostic biomarker for its poor<br>prognosis. |
| Q9P035                        | Very-long-chain<br>(3R)-3-<br>hydroxyacyl-CoA<br>dehydratase 3 | Increase                    | positive regulation by virus of<br>viral protein levels in host cell,<br>positive regulation of viral<br>genome replication, very long-<br>chain fatty acid biosynthetic<br>process                                                                                                                                                                                   | Very-long-chain (3R)-3-<br>hydroxyacyl-CoA dehydratase 3<br>is linked with I-kappaB kinase/<br>NF-kappaB signalling pathways<br>that might contribute to Male<br>breast cancer tumorigenesis.                                                                 |
| Q00796                        | Sorbitol<br>dehydrogenase                                      | Increase                    | glucose metabolic process,<br>response to xenobiotic stimulus,<br>sorbitol catabolic process                                                                                                                                                                                                                                                                          | Serum SORD along with serum<br>AFP levels is considered<br>predictive factor for HCC<br>developed after resection, SORD<br>is expressed in proliferating<br>adenomas cells associated with<br>high fructose-driven metabolic<br>processes.                    |

\* Source: UniProt, available at <https://www.uniprot.org/>

Cont. Summary Table S2.

| Protein<br>UniProt ID | Protein<br>description                                    | Abundance<br>levels | GO – Biological process *                                                                                                                                                                     | Possible Association with Liver<br>cancer or any other cancer                                                                                                                                                                                                                                                                                                                                                                                                                                                             |
|-----------------------|-----------------------------------------------------------|---------------------|-----------------------------------------------------------------------------------------------------------------------------------------------------------------------------------------------|---------------------------------------------------------------------------------------------------------------------------------------------------------------------------------------------------------------------------------------------------------------------------------------------------------------------------------------------------------------------------------------------------------------------------------------------------------------------------------------------------------------------------|
| O60701                | UDP-glucose 6-<br>dehydrogenase                           | Increase            | carbohydrate metabolic process,<br>heparan sulphate proteoglycan<br>biosynthetic process, gastrulation<br>with mouth forming second,<br>glycosaminoglycan biosynthetic<br>process             | UGDH is necessary for cell<br>migration induced by Krüppel-<br>like factor 4 (KLF4) and cell<br>motility through the production<br>of glycosaminoglycans (GAG) in<br>glioblastoma cells.                                                                                                                                                                                                                                                                                                                                  |
| P09936                | Ubiquitin<br>carboxyl-terminal<br>hydrolase isozyme<br>L1 | Increase            | negative regulation of MAP<br>kinase activity,<br>cellular response to xenobiotic<br>stimulus, cell population<br>proliferation, regulation of<br>macroautophagy, protein<br>deubiquitination | UCH-L1 is speculated to be<br>crucial in regulating tumour<br>invasion via stimulation of Akt-<br>mediated pathway in non-small<br>lung cancer cell line H157, UCH-<br>L1 in many tumour types has<br>impact in the regulation of<br>metastasis and cell growth,<br>In lung adenocarcinoma UCHL1<br>might be a potential target and<br>shows a potential oncogenic role,<br>Ubiquitin carboxyl terminal<br>hydrolase-l1 overexpression<br>assisted multi-drug resistance,<br>metastasis and invasion in breast<br>cancer. |

\* Source: UniProt, available at <https://www.uniprot.org/>
