# Supplementary material for: Multi-Omics Analysis Revealed a Significant Alteration of Critical Metabolic Pathways Due to Sorafenib-Resistance in Hep3B Cell Lines
Source: MDPI journal article supplement (doi:10.3390/ijms231911975), 2022-10-09
Supplement: s1 [file s1]

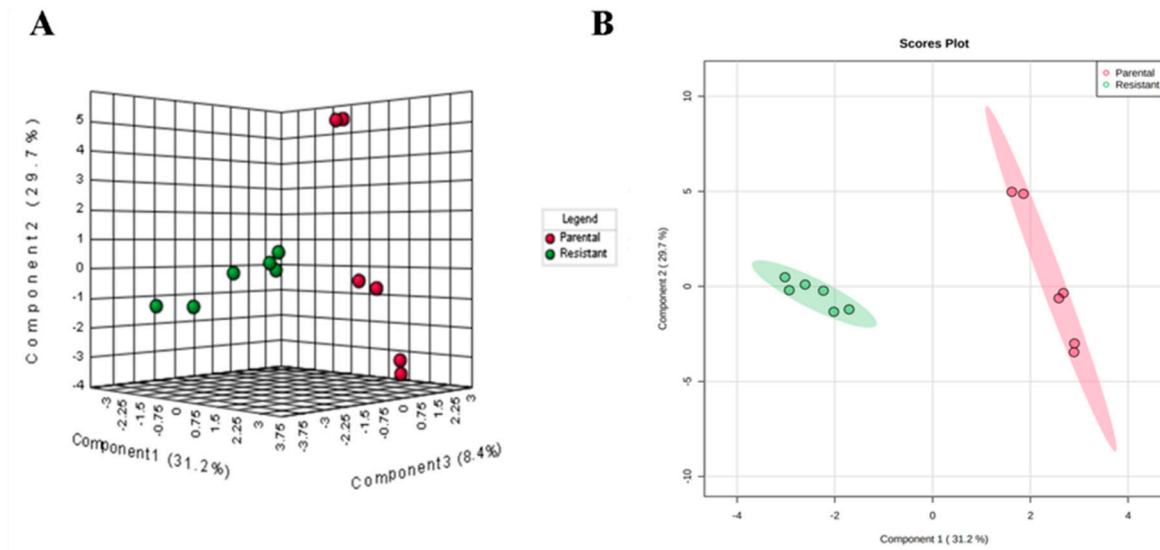

**Figure S1:** The sparse partial least squares-discriminant analysis (sPLS-Da) of parental and resistant Hep3B cells. (A) 3-D scores plot between selected components; (B) 2-D scores plot between selected components.
